# Supplementary material for: Effectiveness of face-to-face, blended and e-learning in teaching the application of local anaesthesia: a randomised study
Source: PubMed Central journal article supplement (PMC7913455; doi:10.1186/s12909-021-02569-z), 2021-02-27
Supplement: 12909_2021_2569_MOESM1_ESM.pdf [file 12909_2021_2569_MOESM1_ESM.pdf]

# Evaluation Form

## General informations

- 1.1 Gender:  F  M
- 1.2 Age:  <22 J.  22-25 J.  >25 J.
- 1.3 Study year:  3rd year  4<sup>th</sup> year
- 1.4 Group:  Lecture  
 E-learning  
 Blended learning

## E-learning

2.1 The e-learning programme is an useful supplement to the course.

- 1 2 3 4 5 6 7 8 9 10  
Totally agree Totally disagree

2.2 The e-learning programme could replace the practical seminar.

- 1 2 3 4 5 6 7 8 9 10  
Totally agree Totally disagree

2.3 The e-learning programme could replace the lecture.

- 1 2 3 4 5 6 7 8 9 10  
Totally agree Totally disagree

2.4 Did you use the e-learning programme for preparation of the course?

- yes  no

2.5 The layout of the programme has a clear presentation.

- 1 2 3 4 5 6 7 8 9 10  
Totally agree Totally disagree

2.6 The programme has an intuitive interface.

- 1 2 3 4 5 6 7 8 9 10  
Totally agree Totally disagree

2.7 The programme is didactically well designed.

- 1 2 3 4 5 6 7 8 9 10  
Totally agree Totally disagree

2.8 The programme has a good amount of educational content.

- 1 2 3 4 5 6 7 8 9 10  
Totally agree Totally disagree

2.9 The programme motivated me to learn more.

- 1 2 3 4 5 6 7 8 9 10  
Totally agree Totally disagree

Effectivity of the course

3.1 Thanks to the seminar, I feel well prepared to perform the procedure on a patient.

1 2 3 4 5 6 7 8 9 10

Totally agree

Totally disagree

3.2 My theoretical knowledge before the seminar was

1 2 3 4 5 6 7 8 9 10

Unsatisfactory

Satisfactory

3.3 My theoretical knowledge after the seminar was

1 2 3 4 5 6 7 8 9 10

Unsatisfactory

Satisfactory

3.4 I felt secure about performing local anaesthesia before the seminar?

1 2 3 4 5 6 7 8 9 10

Totally agree

Totally disagree

3.5 I felt secure about performing local anaesthesia after the seminar?

1 2 3 4 5 6 7 8 9 10

Totally agree

Totally disagree

3.6 Practising the performance of local anaesthesia on each other is very useful.

1 2 3 4 5 6 7 8 9 10

Totally agree

Totally disagree

3.7 Overall satisfaction with the course and the teaching approach.

1 2 3 4 5 6 7 8 9 10

Unsatisfactory

Satisfactory
